# Supplementary material for: α-Tocopherol derived lipid dimers as efficient gene transfection agents. Mechanistic insights into lipoplex internalization and therapeutic induction of apoptotic activity
Source: Royal Society of Chemistry journal article supplement (doi:10.1039/c4ob02063d), 2014-12-08
Supplement: c4ob02063d1.pdf [file c4ob02063d1.pdf]

## **$\alpha$ -Tocopherol derived lipid dimers as efficient gene transfection agents. Mechanistic insights into lipoplex internalization and therapeutic induction of apoptotic activity**

Krishan Kumar,<sup>a</sup> Bappa Maiti,<sup>a</sup> Paturu Kondaiiah,<sup>b</sup> and Santanu Bhattacharya\*<sup>a</sup>

<sup>a</sup>Department of organic chemistry, Indian Institute of Science, 560012 Bangalore, Karnataka, India.

<sup>b</sup>Department of Molecular Reproduction Development and Genetics, Indian Institute of Science, 560012 Bangalore, Karnataka, India.

\*Authors to whom the correspondence should be addressed:

Santanu Bhattacharya; E-mail: [sb@orgchem.iisc.ernet.in](mailto:sb@orgchem.iisc.ernet.in)

Scheme 1<sup>a</sup>

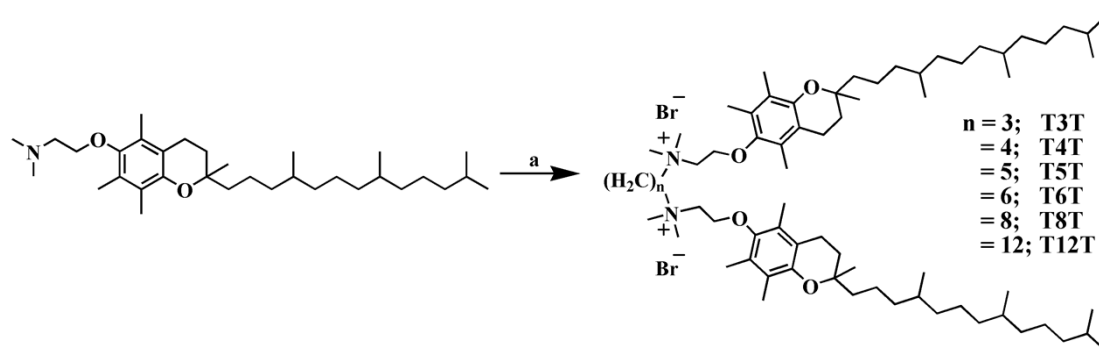

<sup>a</sup>Reagents and Conditions: a)  $\alpha$ ,  $\omega$ -alkanediyl dibromide, MeOH-EtOAc, Pressure tube, 80 °C, ~14 days.

#### Characterization Details<sup>1</sup>.

**T3T:** <sup>1</sup>H NMR (400 MHz, CDCl<sub>3</sub>):  $\delta$  0.83-0.87 (*m*, 24H, -CH-CH<sub>3</sub>, phytyl chain), 1.08-1.53 (*m*, 48H), 1.74-1.80 (*m*, 4H), 2.05 (*s*, 6H, -CH<sub>3</sub>), 2.09 (*s*, 6H, -CH<sub>3</sub>), 2.11 (*s*, 6H, -CH<sub>3</sub>), 2.54 (*s*, 4H), 2.98 (*s*, 2H), 3.60 (*s*, 12H), 4.09-4.14 (*m*, 12H). ESI-MS (HRMS): Calcd for [C<sub>69</sub>H<sub>124</sub>N<sub>2</sub>O<sub>4</sub>Br<sub>2</sub>]<sup>2+</sup>/2: 522.4775, Found: 522.4780. Anal. Calcd for C<sub>69</sub>H<sub>124</sub>N<sub>2</sub>O<sub>4</sub>Br<sub>2</sub>.3H<sub>2</sub>O: C 65.79, H 10.40, N 2.22. Found: C 65.76, H 10.39, N, 2.22.

**T4T:** <sup>1</sup>H NMR (400 MHz, CDCl<sub>3</sub>):  $\delta$  0.83-0.87 (*m*, 24H, -CH-CH<sub>3</sub>, phytyl chain), 1.07-1.57 (*m*, 48H), 1.71-1.78 (*m*, 4H), 2.05 (*s*, 6H, -CH<sub>3</sub>), 2.10 (*s*, 6H, -CH<sub>3</sub>), 2.13 (*s*, 6H, -CH<sub>3</sub>), 2.23 (*s*, 2H), 2.53 (*s*, 4H), 3.6 (*s*, 12H), 4.09-4.12 (*m*, 12H). ESI-MS (HRMS): Calcd for [C<sub>70</sub>H<sub>126</sub>N<sub>2</sub>O<sub>4</sub>Br<sub>2</sub>]<sup>2+</sup>/2: 529.4853, Found: 529.4861. Anal. Calcd for C<sub>70</sub>H<sub>126</sub>N<sub>2</sub>O<sub>4</sub>Br<sub>2</sub>.2H<sub>2</sub>O: C 66.69; H 10.44; N 2.23. Found: C 66.68, H 10.42, N 2.23.

**T5T:** <sup>1</sup>H NMR (400 MHz, CDCl<sub>3</sub>):  $\delta$  0.83-0.87 (*m*, 24H, -CH-CH<sub>3</sub>, phytyl chain), 1.07-1.65 (*m*, 50H), 1.71-1.80 (*m*, 4H), 2.05 (*s*, 6H, -CH<sub>3</sub>), 2.10 (*s*, 6H, -CH<sub>3</sub>), 2.13 (*s*, 6H, -CH<sub>3</sub>), 2.16-2.18 (*m*, 4H), 2.52 (*s*, 4H), 3.57 (*s*, 12H), 4.00-4.06 (*m*, 12H). ESI-MS (HRMS): Calcd for

$[\text{C}_{71}\text{H}_{128}\text{N}_2\text{O}_4\text{Br}_2]^{2+}/2$ : 536.4931, Found: 536.4935. Anal. Calcd for  $\text{C}_{71}\text{H}_{128}\text{N}_2\text{O}_4\text{Br}_2 \cdot 2\text{H}_2\text{O}$ : C 67.17, H 10.48, N 2.21. Found: C 67.19, H 10.47, N 2.20.

**T6T**:  $^1\text{H}$  NMR (400 MHz,  $\text{CDCl}_3$ ):  $\delta$  0.83-0.87 (*m*, 24H, -CH- $\underline{\text{C}}\text{H}_3$ , phytyl chain), 1.07-1.61 (*m*, 52H), 1.72-1.81 (*m*, 4H), 2.06-2.17 (*m*, 4H), 2.06 (*s*, 6H, - $\text{CH}_3$ ), 2.10 (*s*, 6H, - $\text{CH}_3$ ), 2.14 (*s*, 6H, - $\text{CH}_3$ ), 2.55 (*t*, 4H,  $J = 5.6$ ), 3.6 (*s*, 12H), 3.93 (*m*, 4H), 4.07-4.08 (*m*, 8H). ESI-MS (HRMS): Calcd for  $[\text{C}_{72}\text{H}_{130}\text{N}_2\text{O}_4\text{Br}_2]^{2+}/2$  536.6595, Found: 536.6587. Anal. Calcd for  $\text{C}_{72}\text{H}_{130}\text{N}_2\text{O}_4\text{Br}_2 \cdot \text{H}_2\text{O}$ : C 68.33, H 10.51, N 2.21. Found: C 68.32, H 10.52, N 2.22.

**T8T**:  $^1\text{H}$  NMR (400 MHz,  $\text{CDCl}_3$ ):  $\delta$  0.83-0.87 (*m*, 24H, -CH- $\underline{\text{C}}\text{H}_3$ , phytyl chain), 1.08-1.57 (*m*, 56H), 1.72-1.81 (*m*, 4H), 1.98 (*s*, 4H), 2.06 (*s*, 6H, - $\text{CH}_3$ ), 2.10 (*s*, 6H, - $\text{CH}_3$ ), 2.14 (*s*, 6H, - $\text{CH}_3$ ), 2.55 (*m*, 4H), 3.58 (*s*, 12H), 3.9 (*s*, 4H), 4.07-4.10 (*m*, 8H). ESI-MS (HRMS): calcd for  $[\text{C}_{74}\text{H}_{134}\text{N}_2\text{O}_4\text{Br}_2]^{2+}/2$  557.5165, Found: 557.5172; Anal. Calcd for  $\text{C}_{74}\text{H}_{134}\text{N}_2\text{O}_4\text{Br}_2 \cdot 3\text{H}_2\text{O}$ : C 66.84, H 10.61, N 2.11. Found: C 66.85, H 10.60, N 2.11.

**T12T**:  $^1\text{H}$  NMR (400 MHz,  $\text{CDCl}_3$ ):  $\delta$  0.83-0.87 (*m*, 24H, -CH- $\underline{\text{C}}\text{H}_3$ , phytyl chain), 1.07-1.57 (*m*, 64H), 1.74-1.80 (*m*, 4H), 1.88 (*s*, 4H), 2.07 (*s*, 6H, - $\text{CH}_3$ ), 2.10 (*s*, 6H, - $\text{CH}_3$ ), 2.14 (*s*, 6H, - $\text{CH}_3$ ), 2.17 (*m*, 4H), 2.54 (*m*, 4H), 3.56 (*s*, 12H), 3.81-3.85 (*m*, 4H), 4.08-4.11 (*m*, 8H). ESI-MS (HRMS): Calcd for  $[\text{C}_{78}\text{H}_{142}\text{N}_2\text{O}_4\text{Br}_2]^{2+}/2$  585.5479, Found: 585.5470. Anal. Calcd for  $\text{C}_{78}\text{H}_{142}\text{N}_2\text{O}_4\text{Br}_2 \cdot 2\text{H}_2\text{O}$ : C 68.49, H 10.76, N 2.05. Found: C 68.50, H 10.75, N 2.05.

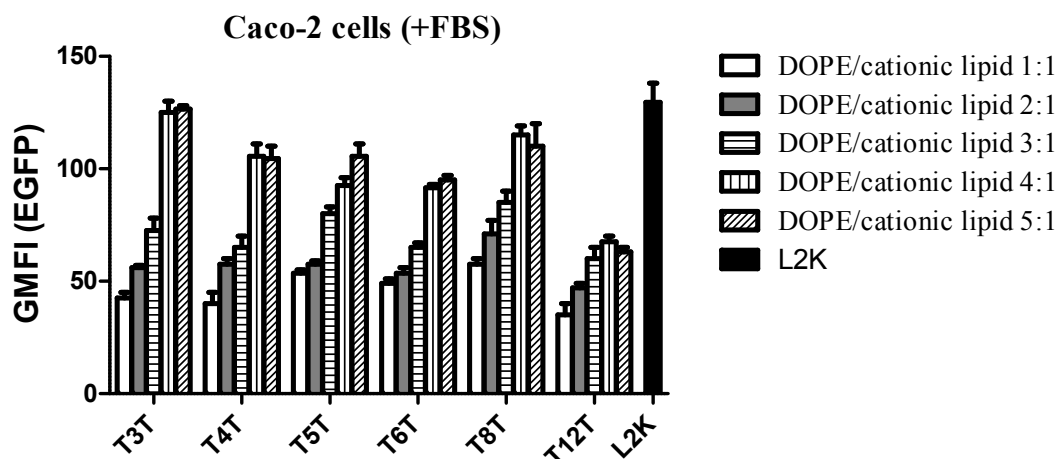

**Fig. S1** Optimization of DOPE content in different gemini lipid formulations. DOPE was mixed with each of the Gemini lipid at molar ratios 1:1 to 5:1 (DOPE/Gemini lipid) and transfections were performed at an N/P ratio of 0.5:1 (Gemini lipid/pDNA) in Caco-2 cells in the presence of serum. The EGFP expression levels were assessed 48 h post transfection under flow cytometry.

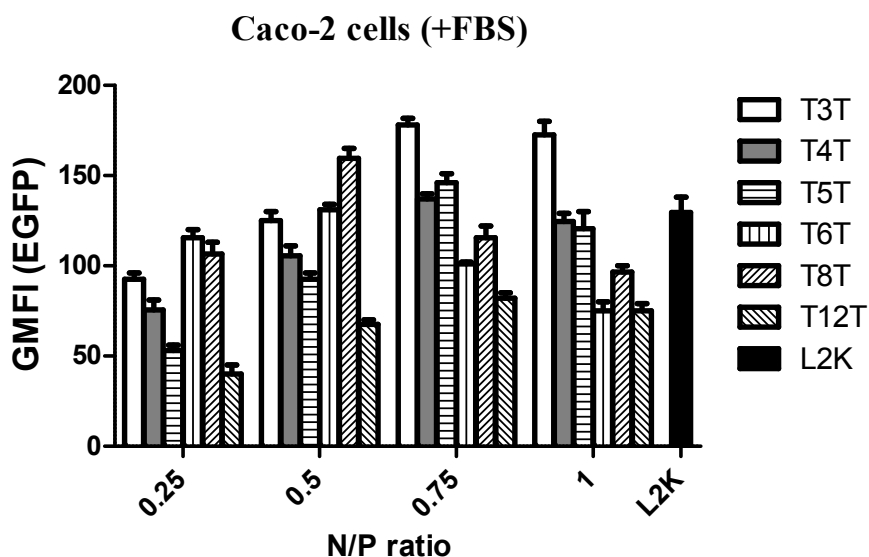

**Fig. S2** Optimization to achieve maximum gene expression levels for transfections mediated by different optimized gemini co-liposomal formulations at different N/P ratios (pDNA, 0.8  $\mu$ g) in Caco-2 cells in the presence of serum. The EGFP expression levels were assessed 48 h post transfection under flow cytometry.

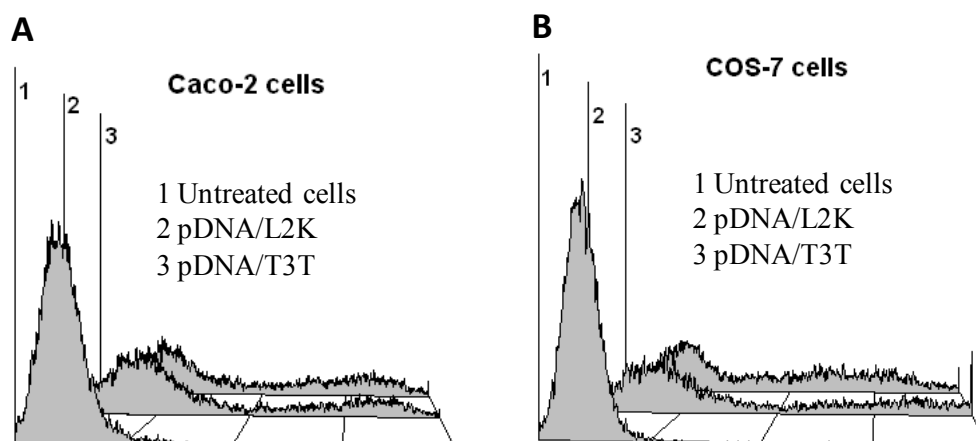

**Fig. S3** Representative flow cytometry histograms depicting EGFP expression levels for transfection mediated by most efficient co-liposomal formulation, T3T in comparison with L2K in the presence of serum in Caco-2 and COS-7 cells.

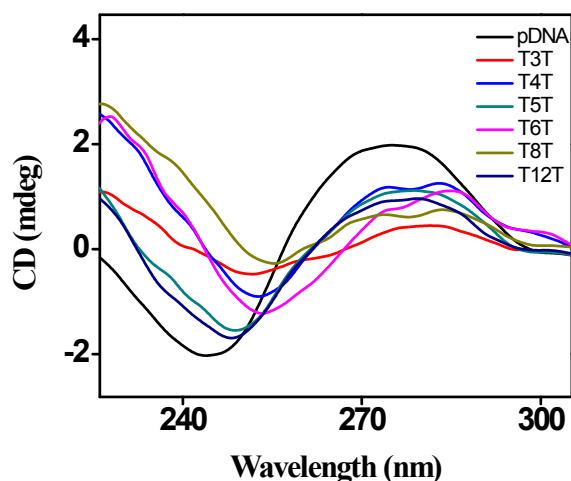

**Fig. S4** Circular dichroism (CD) spectra of *pDNA* alone (50  $\mu\text{g}/\text{mL}$ ) and its complexes with different dimeric lipid suspensions at their optimized ratios of maximum transfection (T3T, T4T, T5T and T12T at N/P ratios of 0.75; T6T and T8T at N/P ratios of 0.5). The spectra were recorded on a Jasco J-815 CD spectropolarimeter in 1 mm quartz cuvette at room temperature.

1. a) B. Kedika and S. V. Patri, *J. Med. Chem.*, 2011, 54, 548.
- b) K. Kumar, B. Maiti, P. Kondaiah and S. Bhattacharya, *Mol. Pharmaceutics*, 2014, DOI: 10.1021/mp500620e
